# Supplementary material for: Tunable conversion from saturable absorption to reverse saturable absorption in poly (pyrrole methine) derivatives
Source: Royal Society of Chemistry journal article supplement (doi:10.1039/c4tc01627k), 2014-09-09
Supplement: c4tc01627k1.pdf [file c4tc01627k1.pdf]

Supplementary Information

Tunable Conversion from Saturable Absorption to Reverse Saturable Absorption in Poly (Pyrrole Methine)  
Derivatives

Suilian Luo<sup>\*a</sup>, Xin'en Liu<sup>a</sup>, Dongqi Wu<sup>b</sup>, Guang Shi<sup>a</sup> and Ting Mei<sup>b</sup>

<sup>a</sup> College of Chemistry and Environment, South China Normal University, Guangzhou 510006, RP China

<sup>b</sup> Institute of Optoelectronic Materials and Technology, South China Normal University, Guangzhou 510000, RP  
China

\* Corresponding authors. E-mail: luosuilian@163.com.

|                                     |      |
|-------------------------------------|------|
| Materials and Measurements.....     | S2   |
| Synthesis and Characterization..... | S2-3 |

### 1. Materials

All starting materials were purchased from commercial suppliers and used without further purification.

### 2. Measurements

The  $^1\text{H}$  NMR spectra was recorded on an AV III Ascend 500 HD spectrometer.  $\overline{M}_n$  was recorded on a waters 1515 GPC.

### 3. Synthesis

The general route is shown in Scheme S1.

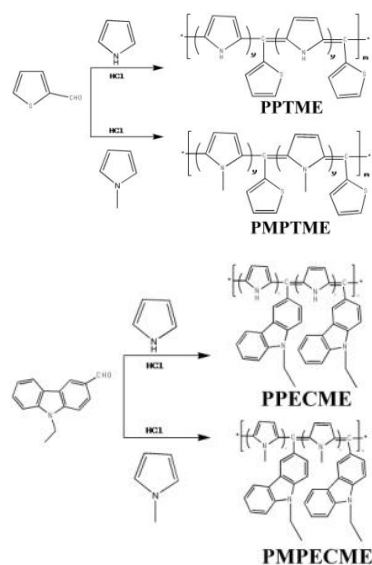

Scheme S1. Synthesis route of four poly (pyrrole methine) derivatives

#### Synthesis of PPTME

A mixture of pyrrole (0.3354g, 5mmol), 2-thienaldehyde (0.5607g, 5mmol) and 36.5% HCl (wt%) 3 drops were dissolved in 15mL  $\text{CH}_2\text{Cl}_2$ . Under the protection of argon, the solution was stirred at  $25^\circ\text{C}$  for 10 h. After removal of solvent, 2 mol% ammonia was used to neutralize crude product for 6 h. Then crude product was washed with water to neutral and vacuum dried for 24h. The crude product was purified by silica gel using PET/ $\text{CH}_2\text{Cl}_2$  as eluent and then vacuum dried. The resulting polymer is as brown solid in 41.8% yield and characterized by  $^1\text{H}$  NMR and GPC.

$^1\text{H}$  NMR (500 MHz,  $\text{CDCl}_3$ ):  $\delta$  8.01-7.49 (m, 13H), 7.26–7.08 (m, 18H), 7.08–6.72 (m, 26H), 6.72–6.09 (m, 28H), 6.09–5.70 (m, 24H), 5.70–5.18 (m, 15H), 2.90–2.82 (s, 9H).  $\overline{M}_n$ =2424.

#### Synthesis of PMPTME

A mixture of 1-methylpyrrole (0.4054g, 5mmol), 2-thienaldehyde (0.5602g, 5mmol) and 36.5% HCl (wt%) 3 drops were dissolved in 15mL  $\text{CH}_2\text{Cl}_2$ . Under the protection of argon, the solution was stirred at  $25^\circ\text{C}$  for 10 h. After removal of solvent, 2 mol% ammonia was used to neutralize crude product for 6 h. Then crude product was washed with water to neutral and vacuum dried for 24h. The crude product was purified by silica gel using PET/ $\text{CH}_2\text{Cl}_2$  as eluent and then vacuum dried. The resulting polymer is as murrey solid in 45.6% yield and characterized by  $^1\text{H}$  NMR and GPC.

$^1\text{H}$  NMR (500 MHz,  $\text{CDCl}_3$ ):  $\delta$  7.48 – 6.63 (m, 81H), 6.73 (s, 20H), 6.73 (s, 16H), 6.55 (s, 5H), 5.95 (d, 11H), 5.90 (s, 3H), 5.76 – 5.18 (m, 45H), 3.39 (m, 30H), 3.16 (s, 39H).  $\overline{M}_n$ =2060.

#### Synthesis of PPECME

A mixture of pyrrole (0.3350g, 5mmol), N-Ethyl-3-carbazolecarboxaldehyde (1.1164g, 5mmol) and 36.5% HCl (wt%) 3 drops were dissolved in 15mL  $\text{CH}_2\text{Cl}_2$ . Under the protection of argon, the solution was stirred at 25 °C for 10 h. After removal of solvent, 2 mol% ammonia was used to neutralize crude product for 6 h. Then crude product was washed with water to neutral and vacuum dried for 24h. The crude product was purified by silica gel using PET/ $\text{CH}_2\text{Cl}_2$  as eluent and then vacuum dried. The resulting polymer is as brown solid in 39.9% yield and characterized by  $^1\text{H}$  NMR and GPC.

$^1\text{H}$  NMR (500 MHz,  $\text{CDCl}_3$ ):  $\delta$  7.58 – 7.39 (m, 13H), 7.38 – 7.27 (m, 16H), 5.37 (s, 2H), 5.32 (s, 2H), 4.46 – 4.19 (m, 10H), 4.19 – 3.24 (m, 10H), 2.96 (s, 2H), 2.89 (s, 2H), 2.78 (d, 12H), 2.91 – 2.02 (m, 18H), 1.55 – 1.14 (m, 57H).  $\overline{M}_n$ =2050.

#### Synthesis of PMPECME

A mixture of 1-methylpyrrole (0.4057g, 5mmol), N-Ethyl-3-carbazolecarboxaldehyde (1.1160g, 5mmol) and 36.5% HCl (wt%) 3 drops were dissolved in 15mL  $\text{CH}_2\text{Cl}_2$ . Under the protection of argon, the solution was stirred at 25 °C for 10 h. After removal of solvent, 2 mol% ammonia was used to neutralize crude product for 6 h. Then crude product was washed with water to neutral and vacuum dried for 24h. The crude product was purified by silica gel using PET/ $\text{CH}_2\text{Cl}_2$  as eluent and then vacuum dried. The resulting polymer is as murrey solid in 42.1% yield and characterized by  $^1\text{H}$  NMR and GPC.

$^1\text{H}$  NMR (500 MHz,  $\text{CDCl}_3$ ):  $\delta$  8.01 (s, 5H), 7.77 (d, 7H), 7.87 – 6.32 (m, 51H), 6.75 (d, 7H), 6.12 (s, 10H), 6.54 – 5.40 (m, 13H), 5.30 (s, 3H), 4.31 (s, 16H), 3.42 (s, 7H), 3.15 (s, 4H), 2.98 (d, 2H), 2.88 (s, 1H), 2.80 (s, 1H), 3.25 – 1.72 (m, 22H), 2.11 (d, 10H), 1.49 – 1.27 (m, 47H).  $\overline{M}_n$ =1841.
